# Supplementary material for: Adherens junctions influence tight junction formation via changes in membrane lipid composition
Source: PubMed Central journal article supplement — J Cell Biol. 2018 Jul 2;217(7):2373–81. doi: 10.1083/jcb.201711042 (PMC6028530; doi:10.1083/jcb.201711042), 2018-07-02
Supplement: JCB_201711042_sm.pdf [file JCB_201711042_sm.pdf]

## Supplemental material

Shigetomi et al., <https://doi.org/10.1083/jcb.201711042>

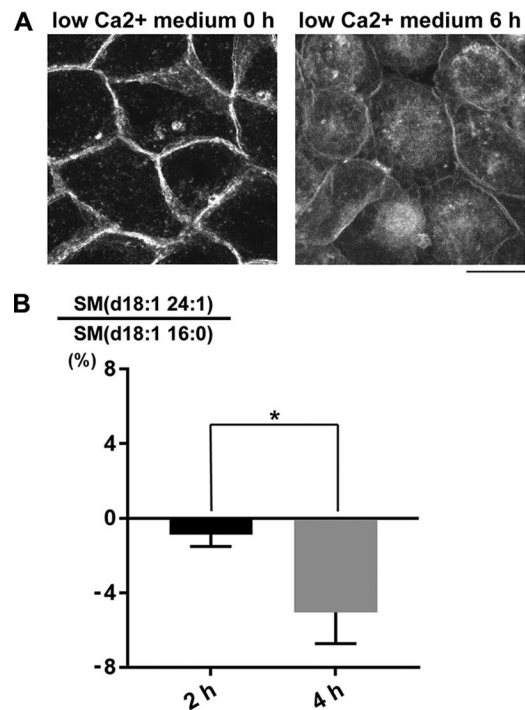

Figure S1. **The changes of PM composition induced by the treatment with low-Ca<sup>2+</sup> medium.** **(A)** Confluent WT EpH4 cells were cultured in low-Ca<sup>2+</sup> medium for 0 h (left) or 6 h (right). After fixation with 4% paraformaldehyde, cells were stained with 50  $\mu\text{g}/\text{ml}$  filipin prepared in PBS. Bar, 20  $\mu\text{m}$ . **(B)** The ratio of very-long-chain SM (d18:1–24:1) to SM (d18:1–16:0) was quantified at 2 or 4 h after treatment with low-Ca<sup>2+</sup> medium. The SD was calculated based on three independent experiments (Student's *t* test, \*,  $P < 0.05$ ).

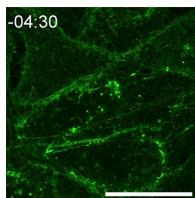

Video 1. **Time-lapse imaging of  $\alpha$ -catenin-KO EpH4 cells expressing GFP-claudin-3.** At time 0, 75 mM cholesterol-saturated M $\beta$ CD was added to the medium to restore the level of cholesterol in the PM. Frames were taken every 30 s. Bar, 20  $\mu\text{m}$ .
